# Supplementary material
Source: PubMed Central journal article supplement (PMC6121921)
Supplement: 10.1194_M087056_jlr.M087056-1.pdf [file 10.1194_M087056_jlr.M087056-1.pdf]

**Supplementary table S1. Composition of high fat diet (per kilogram diet)**

|                                                                          |       |
|--------------------------------------------------------------------------|-------|
| <b>Ingredients</b>                                                       |       |
| Casein <sup>1</sup> (g)                                                  | 270   |
| Corn Starch <sup>1</sup> (g)                                             | 170   |
| Sucrose <sup>2</sup> (g)                                                 | 195   |
| Cellulose <sup>1</sup> (g)                                               | 80    |
| AIN-93-VX Vitamin Mix <sup>1</sup> (g)                                   | 19    |
| Bernhart-Tomarelli Mineral Mix <sup>1</sup> (g)                          | 50    |
| Calcium Phosphate Dibasic <sup>2</sup> (g)                               | 3.4   |
| myo-Inositol <sup>2</sup> (g)                                            | 6.3   |
| L-cysteine <sup>2</sup> (g)                                              | 1.8   |
| Choline Bitartrate <sup>2</sup> (g)                                      | 4.2   |
| Vegetable Oil <sup>3</sup> (g)                                           | 32    |
| Corn Oil <sup>4</sup> (g)                                                | 10    |
| Lard <sup>5</sup> (g)                                                    | 155   |
| DHAsco <sup>6</sup> (g)                                                  | 1.5   |
| Arasco <sup>6</sup> (g)                                                  | 1.5   |
| <b>Fatty acid composition (g/100g of total fatty acids)<sup>7</sup></b>  |       |
| C14:0                                                                    | 1.10  |
| C16:0                                                                    | 21.01 |
| C16:1n-9                                                                 | 1.73  |
| C18:0                                                                    | 12.28 |
| C18:1n-9                                                                 | 37.05 |
| 18:2n-6                                                                  | 22.95 |
| C20:0                                                                    | 0.33  |
| C18:3n-3                                                                 | 1.64  |
| C20:1                                                                    | 0.05  |
| C20:2n-6                                                                 | 0.44  |
| 20:3n-6                                                                  | 0.03  |
| C22:0                                                                    | 0.06  |
| 20:4n-6                                                                  | 0.31  |
| 22:6n-3                                                                  | 0.32  |
| <sup>1</sup> Harlan Teklad (Indianapolis, IN, USA)                       |       |
| <sup>2</sup> Sigma (St. Louis, MO, USA)                                  |       |
| <sup>3</sup> Crisco J.M. Smucker Company (Orrville, OH, USA)             |       |
| <sup>4</sup> Mazola ACH Food Companies Inc. (Oakbrook Terraces, IL, USA) |       |
| <sup>5</sup> TenderFlake (Chicago, IL, USA)                              |       |
| <sup>6</sup> DSM Nutritional Products Inc. (Heerlen, The Netherlands)    |       |
| <sup>7</sup> Determined by gas-liquid chromatography                     |       |

| <b>Supplementary Table S2. qPCR primer sets</b> |                                |                                 |
|-------------------------------------------------|--------------------------------|---------------------------------|
| <i>Gene</i>                                     | <i>Forward sequence</i>        | <i>Reverse sequence</i>         |
| <i>Pcyt1a</i>                                   | GCT AAA GTC AAT TCG AGG AA     | CAT AGG GCT TAC TAA AGT CAA CT  |
| <i>Mogat2</i>                                   | TAC AGC TTT GGC CTC ATG C      | AGG GCT GTG GTG TCA TCT G       |
| <i>Dgat2</i>                                    | GGC TAC GTT GGC TGG TAA CTT    | TTC AGG GTG ACT GCG TTC TT      |
| <i>Abhd5</i>                                    | ATC TTT GGA GCC CGA TCC T      | CTT CTG GCT GAT CTG CAT ACA C   |
| <i>Cidec</i>                                    | GGG TCA CAG CTT GGA GGA        | CTC CAC GAT TGT GCC ATC T       |
| <i>Mttp</i>                                     | ATA CAT GCA AAA TTG AGC GGT CT | CCT GGT CTC TTC TGC AAG CAC     |
| <i>Apoc3</i>                                    | AGG AGT CCG ATA TAG CTG TGG T  | TGC TCC AGT AGC CTT TCA GG      |
| <i>Lpcat3</i>                                   | GGC CTC TCA ATT GCT TAT TTC A  | AGC ACG ACA CAT AGC AAG GA      |
| <i>Lpcat4</i>                                   | GGC CTC CAG AGG GTT AAG TT     | AAA AGC TAG AAG TAC TCG GAT TGG |
| <i>Cd36</i>                                     | TGG CTA AAT GAG ACT GGG ACC    | ACA TCA CCA CTC CAA TCC CAA G   |
| <i>Slc27a4</i>                                  | GAA GGG GGA CCA AGC CTA        | AGT TCC TGG CAC CTC AAC AC      |
| <i>Fabp6</i>                                    | GGC AAA GAA TGT GAA ATG CAG    | CCG AAG TCT GGT GAT AGT TGG     |
| <i>Slc10a2</i>                                  | AGC TGG TCA ACC CTG GTA CA     | GGG GGA GAA GGA GAG CTG         |
| <i>Slc51a</i>                                   | GCT GCC CAC CTC TCA TAC TT     | GAA GAA GGC GTA CTG GAA AGG     |
| <i>Slc51b</i>                                   | GAG CAT CCT GGC AAA CAG A      | TGC AGG TCT TCT GGT GTT TCT     |
| <i>Nr0b2</i>                                    | CGA TCC TCT TCA ACC CAG AT     | AGC CTC CTG TTG CAG GTG T       |
| <i>Cyp7a1</i>                                   | ACA CCA TTC CTG CAA CCT TC     | TCT TGG CCA GCA CTC TGT AA      |
| <i>Cyp8b1</i>                                   | GCA GCA CTG AAT ACC CAT CC     | TCT GAG AGC TGG GGA GAG G       |
| <i>Cyp27a1</i>                                  | CTT TCC TGA GCT GCT TTT GG     | CAC CAG TCA CTT CCT TGT GC      |

Figure S1.

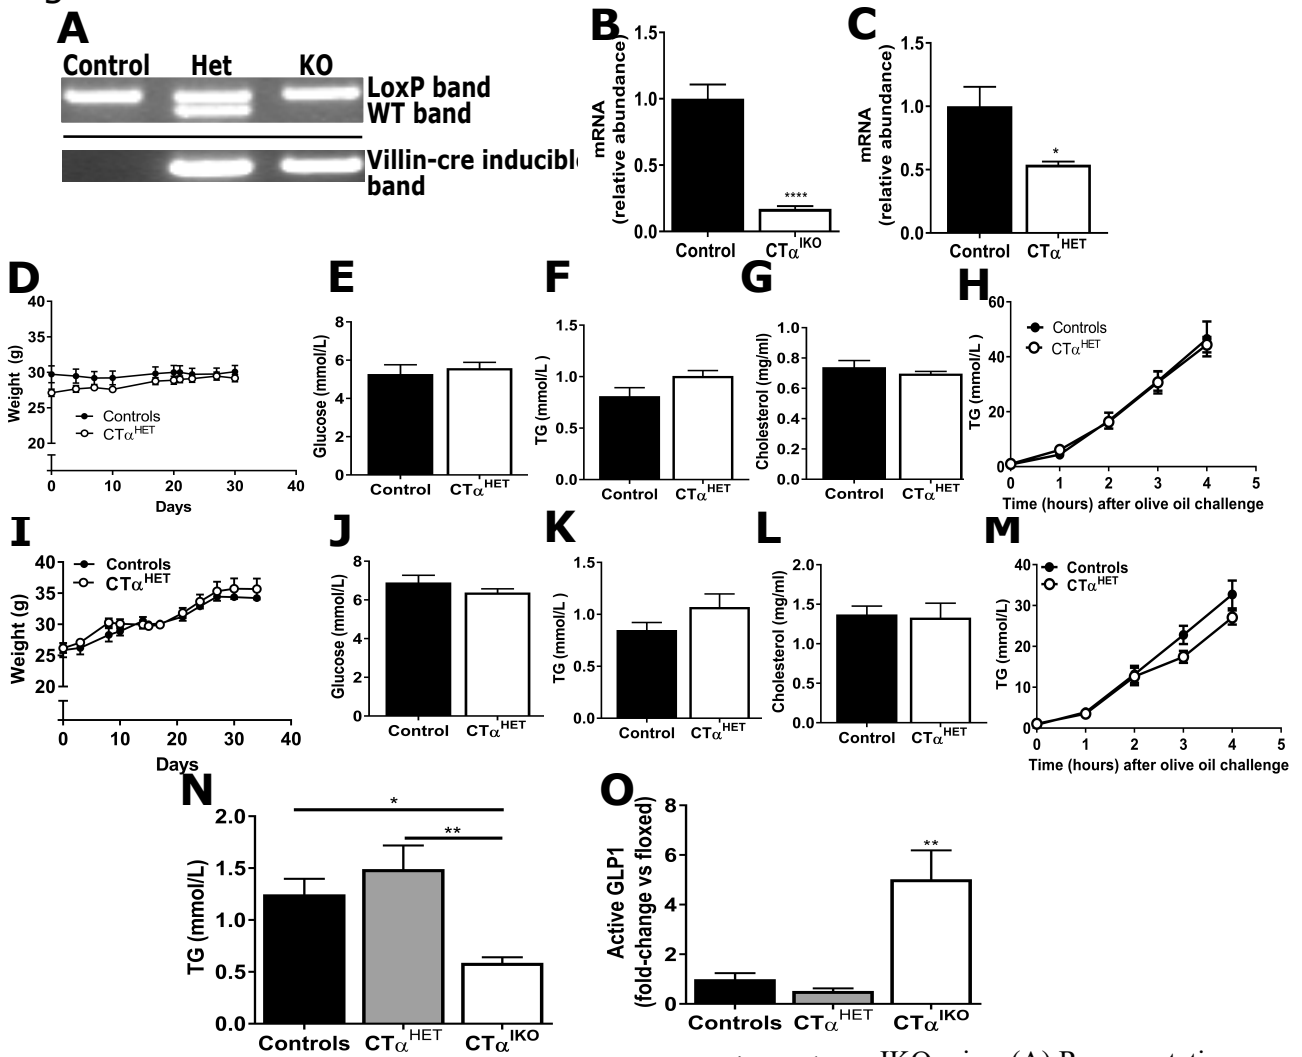

**Supplementary Fig. S1. Metabolic phenotyping of CT $\alpha$  Het mice and CT $\alpha$ IKO mice.** (A) Representative genotyping of *Pcyt1a*<sup>LoxP/LoxP</sup> without Villin-Cre (Control), *Pcyt1a*<sup>LoxP/WT</sup> with Villin-Cre (CT $\alpha$  Het) and *Pcyt1a*<sup>LoxP/LoxP</sup> with Villin-Cre (CT $\alpha$  IKO). (B) *Pcyt1a* mRNA in the jejunum of control and CT $\alpha$  IKO mice 50 days after Cre induction (n=5/group). (C) *Pcyt1a* mRNA in jejunums of vehicle-treated *Pcyt1a*<sup>LoxP/WT</sup>; Villin-CreERT2 (control) mice and CT $\alpha$  Het mice (n=5/group). (D) Growth curves, (E) fasting blood glucose, (F) fasting plasma TG concentrations, (G) fasting plasma cholesterol concentrations, and (H) plasma TG before and 1, 2, 3, 4 h after an oral bolus of olive oil and intraperitoneal injection of Poloxamer-407 in CT $\alpha$  Het mice and vehicle-treated *Pcyt1a*<sup>LoxP/WT</sup>; Villin-CreERT2 (control) mice fed the chow diet (n=5/group). (I) Growth curves, (J) fasting blood glucose (K) fasting plasma TG concentrations, (L) fasting plasma cholesterol concentrations, and (M) plasma TG before and 1, 2, 3, 4 h after an oral bolus of olive oil and intraperitoneal injection of Poloxamer -407 in CT $\alpha$  Het mice and vehicle-treated *Pcyt1a*<sup>LoxP/WT</sup>; Villin-CreERT2 (control) mice fed the HFD (n=5-6/group). (N) Plasma TG and (O) active GLP-1 2 h after HFD re-feeding in tamoxifen-treated floxed controls, CT $\alpha$  HET mice and CT $\alpha$  IKO mice fed the HFD (n=5/group). All mice were female. Values are means  $\pm$  SEM. \*p<.05, \*\*p<.01. are means  $\pm$  SEM. \*p<.05, \*\*\*\*p<.0001.
